# Supplementary material for: Exploring Holocene Changes in Palynological Richness in Northern Europe – Did Postglacial Immigration Matter?
Source: PubMed Central journal article supplement (PMC3519870; doi:10.1371/journal.pone.0051624), 2012-12-11
Supplement: pone.0051624.s001.pdf [file pone.0051624.s001.pdf]

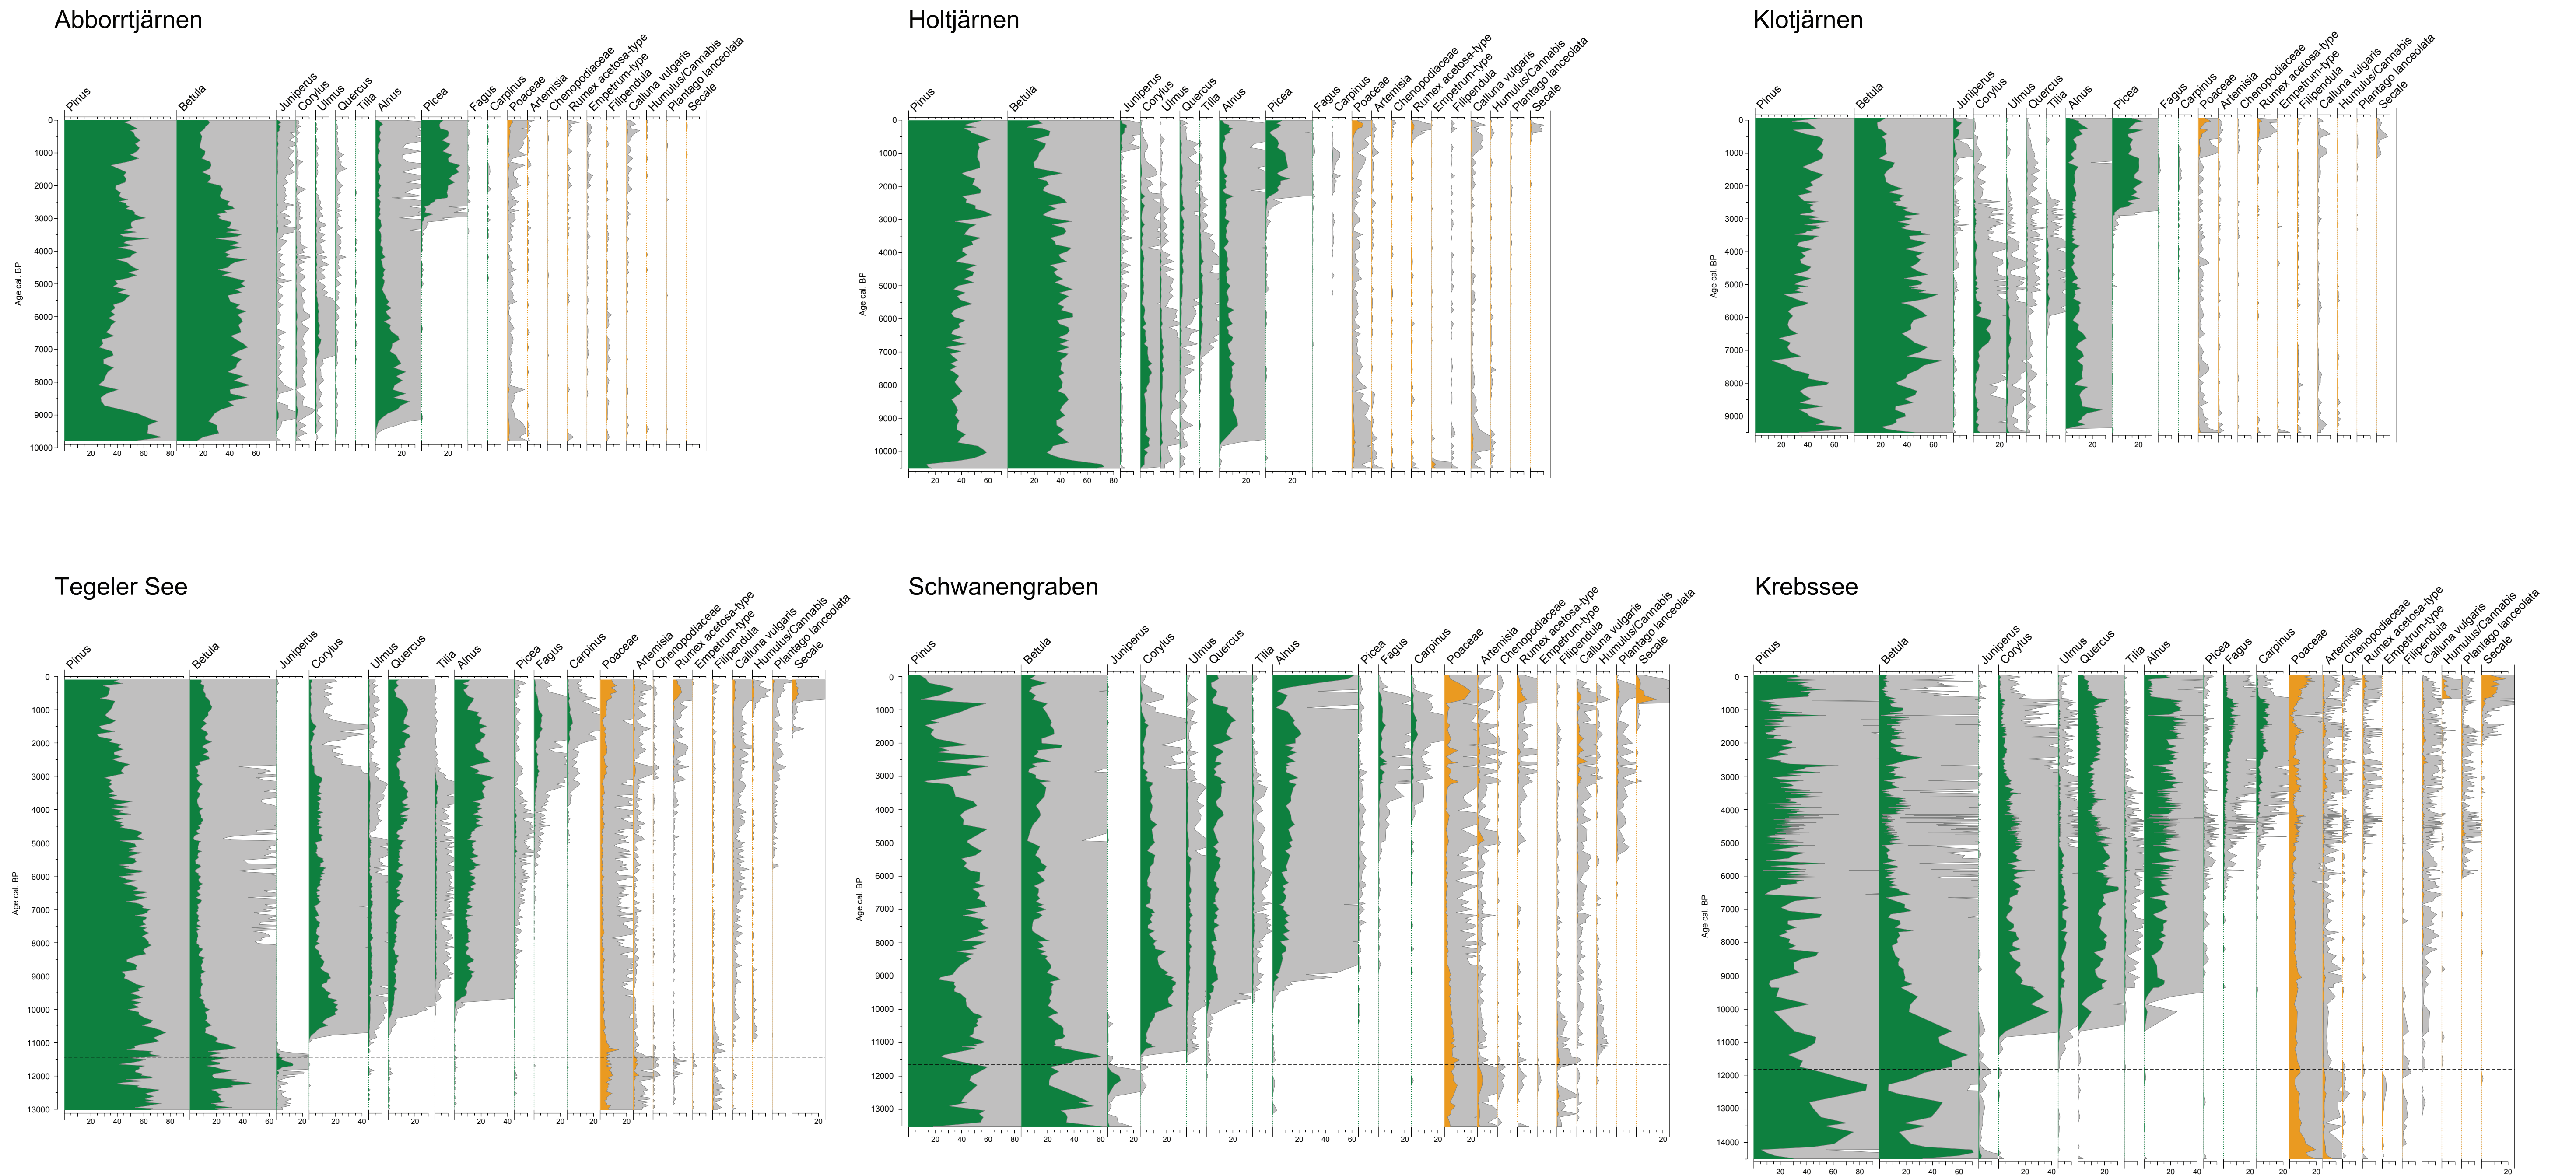

**Figure S1.** Percentage pollen diagrams showing a standardized set of selected taxa. The dotted lines in the diagrams from the southern sites mark the Holocene/Late-Glacial boundary as determined from pollen stratigraphy, which corresponds to slightly different ages at the three sites due to uncertainties in the age models.
