# Supplementary material for: Exploring Holocene Changes in Palynological Richness in Northern Europe – Did Postglacial Immigration Matter?
Source: PubMed Central journal article supplement (PMC3519870; doi:10.1371/journal.pone.0051624), 2012-12-11
Supplement: pone.0051624.s002.pdf [file pone.0051624.s002.pdf]

**Table S1.** List of pollen types associated with archaeophytes and neophytes and therefore removed from dataset A, creating the restricted dataset B.

*Aesculus*  
*Aphanes*  
*Avena*-type  
*Castanea*  
*Centaurea cyanus*  
*Cerealia* undiff.  
*Cerealia*-type  
*Delphinium*  
*Echium*  
*Fagopyrum*  
*Fallopia*  
*Hordeum*-type  
*Impatiens*  
*Jasminum*  
*Linum usitatissimum*  
Malvaceae  
*Nigella*  
*Papaver argemone*  
*Papaver rhoeas*-type  
*Platanus*  
*Scleranthus annuus*  
*Secale*  
*Triticum*  
*Verbena*  
*Zea mays*
