# Supplementary material for: Exploring Holocene Changes in Palynological Richness in Northern Europe – Did Postglacial Immigration Matter?
Source: PubMed Central journal article supplement (PMC3519870; doi:10.1371/journal.pone.0051624), 2012-12-11
Supplement: pone.0051624.s003.pdf [file pone.0051624.s003.pdf]

**Table S2.** Occurrences of selected pollen and spore taxa from 113 sites in Berlin/Brandenburg.

Approximate ages of Firbas zones boundaries for Berlin/Brandenburg in years cal. BP:

1/2=14000; 2/3=12600; 3/4=11500; 4/5=10500; 5/6=9500; 6/7=8200; 7/8=5900; 8/9=2700; 9/10=800.

| Pollen / spore taxon          | Firbas zone |   |   |   |   |   |   |   |   |    |
|-------------------------------|-------------|---|---|---|---|---|---|---|---|----|
|                               | 1           | 2 | 3 | 4 | 5 | 6 | 7 | 8 | 9 | 10 |
| Aesculus                      |             |   |   |   |   |   |   |   |   | 1  |
| Bidens-type                   |             |   |   |   |   |   |   |   |   | 1  |
| Buxus                         |             |   |   |   |   |   |   |   |   | 1  |
| Erodium                       |             |   |   |   |   |   |   |   |   | 1  |
| Herniaria-type                |             |   |   |   |   |   |   |   |   | 1  |
| Lycopsis                      |             |   |   |   |   |   |   |   |   | 1  |
| Osmunda                       |             |   |   |   |   |   |   |   |   | 1  |
| Papaver rhoeas-type           |             |   |   |   |   |   |   |   |   | 1  |
| Platanus                      |             |   |   |   |   |   |   |   |   | 1  |
| Rubus-type                    |             |   |   |   |   |   |   |   |   | 1  |
| Verbena                       |             |   |   |   |   |   |   |   |   | 1  |
| Castanea                      |             |   |   |   |   |   |   |   | 1 | 1  |
| Fagopyrum                     |             |   |   |   |   |   |   |   | 1 | 1  |
| Impatiens                     |             |   |   |   |   |   |   |   | 1 | 1  |
| Linum usitatissimum           |             |   |   |   |   |   |   |   | 1 | 1  |
| Malvaceae                     |             |   |   |   |   |   |   |   | 1 | 1  |
| Mercurialis annua             |             |   |   |   |   |   |   |   | 1 | 1  |
| Sagina                        |             |   |   |   |   |   |   |   | 1 | 1  |
| Scleranthus annuus            |             |   |   |   |   |   |   |   | 1 | 1  |
| Viola arvensis                |             |   |   |   |   |   |   |   | 1 | 1  |
| Convolvulus arvensis          |             |   |   |   |   |   |   | 1 | 1 | 1  |
| Hydrocharis                   |             |   |   |   |   |   |   |   | 1 |    |
| Hydrocotyle                   |             |   |   |   |   |   |   | 1 | 1 | 1  |
| Juglans                       |             |   |   |   |   |   |   | 1 | 1 | 1  |
| Ledum                         |             |   |   |   |   |   |   | 1 | 1 | 1  |
| Radiola                       |             |   |   |   |   |   |   | 1 |   | 1  |
| Stratiotes                    |             |   |   |   |   |   |   | 1 | 1 | 1  |
| Symphytum                     |             |   |   |   |   |   |   | 1 | 1 | 1  |
| Linum                         |             |   |   |   |   |   | 1 |   | 1 | 1  |
| Euphorbia                     |             |   |   |   |   |   | 1 | 1 | 1 | 1  |
| Gentiana pneumonanthe-type    |             |   |   |   |   |   |   | 1 | 1 |    |
| Iris                          |             |   |   |   |   |   | 1 | 1 | 1 | 1  |
| Lonicera                      |             |   |   |   |   |   |   | 1 | 1 |    |
| Sambucus                      |             |   |   |   |   |   | 1 | 1 | 1 | 1  |
| Thesium                       |             |   |   |   |   |   |   | 1 | 1 |    |
| Drosera intermedia            |             |   |   |   |   | 1 |   |   | 1 | 1  |
| Drosera rot./angl.            |             |   |   |   |   | 1 |   | 1 | 1 | 1  |
| Sagittaria                    |             |   |   |   |   | 1 |   | 1 | 1 | 1  |
| Scleranthus perennis          |             |   |   |   |   | 1 |   | 1 | 1 | 1  |
| Vitis                         |             |   |   |   |   | 1 |   | 1 | 1 | 1  |
| Andromeda                     |             |   |   |   | 1 |   |   |   | 1 | 1  |
| Anthoceros laevis-type        |             |   |   |   | 1 |   |   | 1 | 1 | 1  |
| Cuscuta europaea-type         |             |   |   |   | 1 |   |   |   | 1 | 1  |
| Epipactis palustris-type      |             |   |   |   | 1 |   |   |   | 1 | 1  |
| Mercurialis perennis          |             |   |   |   |   | 1 | 1 | 1 | 1 | 1  |
| Rubus chamaemorus             |             |   |   |   |   |   |   | 1 |   |    |
| Dipsacaceae                   |             |   |   |   |   |   | 1 | 1 |   | 1  |
| Riccia                        |             |   |   | 1 |   |   |   | 1 | 1 | 1  |
| Cornus sanguinea              |             |   |   |   | 1 | 1 | 1 | 1 | 1 | 1  |
| Hedera                        |             |   |   |   | 1 | 1 | 1 | 1 | 1 | 1  |
| Pedicularis palustris-type    |             |   |   | 1 |   |   |   | 1 | 1 | 1  |
| Taxus                         |             |   |   |   | 1 | 1 | 1 | 1 | 1 | 1  |
| Spergularia-type              |             |   |   | 1 |   | 1 |   | 1 | 1 | 1  |
| Acer                          |             |   |   | 1 |   | 1 | 1 | 1 | 1 | 1  |
| Anthericum                    |             |   |   | 1 |   | 1 | 1 | 1 | 1 | 1  |
| Echium                        |             |   |   | 1 |   |   |   |   | 1 | 1  |
| Scabiosa                      |             |   |   | 1 |   | 1 | 1 | 1 | 1 | 1  |
| Alisma plantago-aquatica-type |             |   |   | 1 |   | 1 | 1 | 1 | 1 | 1  |
| Calystegia                    |             |   |   | 1 | 1 | 1 | 1 | 1 | 1 | 1  |
| Centaurea cyanus              | 1           |   |   |   |   |   |   | 1 | 1 | 1  |
| Frangula                      |             |   |   | 1 | 1 | 1 | 1 | 1 | 1 | 1  |
| Knautia                       |             |   |   |   |   |   | 1 |   | 1 | 1  |
| Lycopodium annotinum-type     |             |   |   |   |   | 1 | 1 | 1 | 1 | 1  |
| Papaver argemone              |             |   |   |   |   |   |   |   | 1 | 1  |
| Polygala                      |             |   |   |   |   | 1 |   | 1 |   |    |
| Rhamnus cathartica            |             |   |   | 1 | 1 | 1 | 1 | 1 | 1 | 1  |
| Solanum dulcamara             |             |   |   | 1 | 1 | 1 | 1 | 1 | 1 | 1  |
| Viburnum                      |             |   |   | 1 | 1 | 1 | 1 | 1 | 1 | 1  |
| Viscum                        |             |   |   | 1 | 1 | 1 | 1 | 1 | 1 | 1  |

| Pollen / spore taxon       | Firbas zone |   |   |   |   |   |   |   |   |    |
|----------------------------|-------------|---|---|---|---|---|---|---|---|----|
|                            | 1           | 2 | 3 | 4 | 5 | 6 | 7 | 8 | 9 | 10 |
| Lycopodium clavatum-type   |             |   | 1 |   | 1 | 1 | 1 | 1 | 1 | 1  |
| Anthoceros punctatus-type  | 1           |   |   |   |   | 1 |   | 1 | 1 | 1  |
| Sedum                      |             | 1 |   | 1 |   | 1 | 1 | 1 | 1 | 1  |
| Cladium                    |             |   | 1 | 1 | 1 | 1 | 1 | 1 | 1 | 1  |
| Lycopodium inundatum       |             | 1 |   | 1 |   | 1 |   | 1 | 1 | 1  |
| Lysimachia                 |             |   | 1 | 1 | 1 | 1 | 1 | 1 | 1 | 1  |
| Scheuchzeria               |             | 1 |   | 1 |   | 1 |   | 1 | 1 | 1  |
| Succisa                    |             |   | 1 | 1 | 1 | 1 | 1 | 1 | 1 | 1  |
| Teucrium-type              |             |   | 1 |   |   |   |   |   |   | 1  |
| Campanula                  |             | 1 | 1 |   |   |   |   | 1 | 1 | 1  |
| Jasione                    |             | 1 |   | 1 | 1 | 1 | 1 | 1 | 1 | 1  |
| Lythrum                    |             | 1 |   | 1 | 1 | 1 | 1 | 1 | 1 | 1  |
| Thelypteris palustris      |             | 1 |   | 1 | 1 | 1 | 1 | 1 | 1 | 1  |
| Utricularia                |             |   | 1 | 1 | 1 | 1 | 1 | 1 | 1 | 1  |
| Polygonum convolvulus-type | 1           |   | 1 |   |   | 1 | 1 | 1 | 1 | 1  |
| Polygonum persicaria-type  | 1           |   |   | 1 | 1 | 1 |   | 1 | 1 | 1  |
| Polypodium                 |             | 1 | 1 | 1 |   | 1 | 1 | 1 | 1 | 1  |
| Valeriana                  |             | 1 | 1 | 1 |   | 1 | 1 | 1 | 1 | 1  |
| Xanthium                   | 1           |   | 1 |   | 1 | 1 | 1 | 1 | 1 | 1  |
| Campanulaceae              |             | 1 | 1 | 1 | 1 | 1 | 1 | 1 | 1 | 1  |
| Rumex subg. Rumex          |             | 1 | 1 | 1 | 1 | 1 | 1 | 1 | 1 | 1  |
| Lemnaceae                  | 1           | 1 |   |   | 1 | 1 | 1 | 1 | 1 | 1  |
| Nuphar                     |             | 1 | 1 | 1 | 1 | 1 | 1 | 1 | 1 | 1  |
| Polygonum amphibium        |             | 1 | 1 | 1 | 1 |   | 1 | 1 | 1 | 1  |
| Polygonum aviculare-type   |             | 1 | 1 | 1 | 1 | 1 | 1 | 1 | 1 | 1  |
| Pteridium                  |             | 1 | 1 | 1 | 1 | 1 | 1 | 1 | 1 | 1  |
| Plantago maritima-type     | 1           | 1 | 1 |   |   | 1 | 1 | 1 | 1 | 1  |
| Ephedra distachya-type     |             | 1 | 1 | 1 |   | 1 | 1 | 1 |   | 1  |
| Gentianaceae               | 1           | 1 | 1 |   |   | 1 |   | 1 | 1 | 1  |
| Centaurea jacea-type       | 1           | 1 | 1 | 1 |   | 1 | 1 | 1 | 1 | 1  |
| Epilobium                  | 1           | 1 | 1 | 1 |   | 1 | 1 | 1 | 1 | 1  |
| Plantago lanceolata        | 1           | 1 | 1 | 1 |   | 1 | 1 | 1 | 1 | 1  |
| Armeria                    | 1           | 1 |   |   |   |   |   |   | 1 | 1  |
| Botrychium                 | 1           | 1 | 1 | 1 | 1 | 1 | 1 | 1 | 1 | 1  |
| Chenopodiaceae             | 1           | 1 | 1 | 1 | 1 | 1 | 1 | 1 | 1 | 1  |
| Cirsium-type               | 1           | 1 | 1 | 1 | 1 | 1 | 1 | 1 | 1 | 1  |
| Brassicaceae               | 1           | 1 | 1 | 1 | 1 | 1 | 1 | 1 | 1 | 1  |
| Hippophae                  | 1           | 1 | 1 | 1 | 1 | 1 | 1 | 1 | 1 | 1  |
| Juniperus                  | 1           | 1 | 1 | 1 | 1 | 1 | 1 | 1 | 1 | 1  |
| Lotus                      | 1           | 1 | 1 | 1 | 1 | 1 | 1 | 1 | 1 | 1  |
| Lycopodium selago          | 1           |   |   |   |   |   |   |   |   | 1  |
| Menyanthes                 | 1           | 1 | 1 | 1 | 1 | 1 | 1 | 1 | 1 | 1  |
| Nymphaea                   | 1           | 1 | 1 | 1 | 1 | 1 | 1 | 1 | 1 | 1  |
| Ophioglossum               | 1           | 1 | 1 | 1 | 1 | 1 | 1 | 1 | 1 | 1  |
| Plantago major/media       | 1           | 1 | 1 | 1 | 1 | 1 | 1 | 1 | 1 | 1  |
| Rumex acetosa-type         | 1           | 1 | 1 | 1 | 1 | 1 | 1 | 1 | 1 | 1  |
| Sanguisorba officinalis    | 1           | 1 | 1 | 1 | 1 | 1 | 1 | 1 | 1 | 1  |
| Sparganium erectum-type    | 1           | 1 | 1 | 1 | 1 | 1 | 1 | 1 | 1 | 1  |
| Thalictrum                 | 1           | 1 | 1 | 1 | 1 | 1 | 1 | 1 | 1 | 1  |
| Typha angustifolia         | 1           | 1 | 1 | 1 | 1 | 1 | 1 | 1 | 1 | 1  |
| Typha latifolia-type       | 1           | 1 | 1 | 1 | 1 | 1 | 1 | 1 | 1 | 1  |
| Urticaceae                 | 1           | 1 | 1 | 1 | 1 | 1 | 1 | 1 | 1 | 1  |
| Centaurea scabiosa-type    | 1           | 1 | 1 | 1 | 1 |   | 1 | 1 | 1 | 1  |
| Helianthemum               | 1           | 1 | 1 | 1 | 1 |   | 1 | 1 | 1 | 1  |
| Parnassia                  | 1           | 1 | 1 | 1 | 1 |   | 1 | 1 | 1 | 1  |
| Ephedra fragilis-type      |             | 1 | 1 | 1 |   |   |   | 1 |   | 1  |
| Myriophyllum spic./vert.   | 1           | 1 | 1 | 1 | 1 | 1 |   | 1 | 1 | 1  |
| Gypsophila                 | 1           | 1 | 1 | 1 | 1 | 1 | 1 |   |   | 1  |
| Polygonum bistorta-type    | 1           | 1 | 1 | 1 | 1 | 1 |   |   | 1 | 1  |
| Sanguisorba minor          | 1           | 1 | 1 | 1 |   |   |   |   | 1 | 1  |
| Geum-type                  |             | 1 | 1 | 1 |   |   |   |   | 1 |    |
| Arctostaphylos             | 1           | 1 | 1 | 1 |   | 1 | 1 | 1 |   |    |
| Larix                      | 1           | 1 | 1 |   |   |   |   |   |   | 1  |
| Selaginella selaginoides   | 1           | 1 | 1 | 1 |   | 1 | 1 |   |   |    |
| Dryas-type                 |             | 1 | 1 | 1 | 1 |   |   |   |   |    |
| Empetrum                   | 1           | 1 | 1 | 1 | 1 | 1 |   |   |   |    |
| Saxifraga hirculus-type    | 1           | 1 | 1 |   |   |   | 1 |   |   |    |
| Hippuris                   | 1           | 1 | 1 | 1 |   | 1 |   |   |   |    |
| Gymnocarpium               |             | 1 |   | 1 |   |   |   |   |   |    |
| Myriophyllum alterniflorum |             | 1 | 1 | 1 |   |   |   |   |   |    |
| Polemonium                 | 1           | 1 | 1 |   |   |   |   |   |   |    |
| Saxifraga                  | 1           |   | 1 |   |   |   |   |   |   |    |
| Saxifraga aizoides-type    | 1           | 1 | 1 |   |   |   |   |   |   |    |
